# Supplementary material
Source: PubMed Central journal article supplement (PMC5223224)
Supplement: cr2016115x1.pdf [file cr2016115x1.pdf]

**Table S1.** Primers used for detection of the recombinant structures (Figure 1, Figure S4).

| <b>Fragment</b> | <b>Primer</b> | <b>Sequence (5'-3')</b>     |
|-----------------|---------------|-----------------------------|
| <b>f1</b>       | f1-F          | ACAAGCAAGGGTTGTAGGTCCATT    |
|                 | f1-R          | CAGCAGGGAGTTCAGTGGTCAAAC    |
| <b>f2</b>       | f1-F          | ACAAGCAAGGGTTGTAGGTCCATT    |
|                 | f2-R          | GGAGGCAAAAATCCTCCTTCTTCT    |
| <b>f3</b>       | f1-F          | ACAAGCAAGGGTTGTAGGTCCATT    |
|                 | f3-R          | GTTGATGCCATCAGCGCGTCCAT     |
| <b>f4</b>       | f1-F          | ACAAGCAAGGGTTGTAGGTCCATT    |
|                 | f4-R          | TTCACCCTTCTCTCAGCCATGT      |
| <b>f5</b>       | f5-F          | TGCTCTCGAGCCAATGCCAATACCA   |
|                 | f5-R          | GGTTATCGAAACCTTGAAGGGAATAG  |
| <b>f6</b>       | f6-F          | CCAGTCTCTGTTCCGATATCTGGAA   |
|                 | f6-R          | AGTGCTTAGTTTACCCGCGTACAAG   |
| <b>f7</b>       | f7-F          | GAATGAAGTGTGTGTGAGCAGTAAG   |
|                 | f7-R          | CCATCTCTTTACTAGAATCCGATGTG  |
| <b>f8</b>       | f6-F          | CCAGTCTCTGTTCCGATATCTGGAA   |
|                 | f7-R          | CCATCTCTTTACTAGAATCCGATGTG  |
| <b>f9</b>       | f9-F          | CGGATAGTTCACAGTGCTCATTCT    |
|                 | f9-R          | CGGATAGTTCACAGTGCTCATTCT    |
| <b>f10</b>      | f10-F         | AGGGCTTTGTACCAACCATTCTAGTGT |
|                 | f10-R         | GCAAAGCGCGAAAAGAACGTGGATTGA |
| <b>cs1</b>      | cs1-F         | TTCGGTCAATCACCCGCTTCCA      |
|                 | cs1-R         | AGGAGGCTGAGTTTIGATCCTCAT    |
