# Supplementary material
Source: PubMed Central journal article supplement (PMC5223224)
Supplement: cr2016115x2.pdf [file cr2016115x2.pdf]

**Table S2.** Specific primers used for hiTAIL-PCR (Figure 1).

| <b>Construct</b>   | <b>Primer</b>        | <b>Sequence (5'-3')</b>                            |
|--------------------|----------------------|----------------------------------------------------|
| <b>S367/S356</b>   | CS3T-F1              | GCCTTATTTGACCTGTTGATTCTTTTC                        |
|                    | CS3T-F2              | ACGATGGACTCCAGAGCGGGAGTCCGTTTAAAGAAGAAGGAGGATT     |
|                    | CS3T-F3              | TAGCATCGGGCCCTTCAGTTGTACAA                         |
| <b>S284a/S284b</b> | CS1T-F1              | CTCCGATTTGGCGGAAGATTTGGTCAGT                       |
|                    | CS1T-F2              | ACGATGGACTCCAGAGCGGGAGTCCTAGAAGTACCGCCTCGTCGGTCAAT |
|                    | CS1T-F3              | CGCTCTTCCTGTTATGCAGGAAGCAGCTAAT                    |
|                    | CS1RT-F1             | CGATTAGCTGCTTCCTGCATAACAGGAAGA                     |
|                    | CS1RT-F2             | ACGATGGACTCCAGAGCGGGAGTCCGTTCCCCTTGAAGCGGTTGATTGA  |
|                    | CS1RT-F3             | CTGACCAAATCTCCGCCAAATCGGAAGT                       |
|                    | <b>S310/S352a/ b</b> | S310T-F1                                           |
| S310T-F2           |                      | ACGATGGACTCCAGAGCGGGAGTCAAAGATGGCGGGCCTGCATCCAAGT  |
| S310T-F3           |                      | GGTTGCACCAAATGCTCGACGACCTACAGA                     |
| <b>S310</b>        | S310RT-F1            | GAATGGATTGCACGCAATCCCCTCCTAT                       |
|                    | S310RT-F2            | ACGATGGACTCCAGAGCGGGAGTCTCCTATTATCTCGTCAACTGGATAC  |
|                    | S310RT-F3            | CCCCTGGAAGCGGTTGATTGACCGAAGGTT                     |
