# Supplementary material
Source: PubMed Central journal article supplement (PMC5223224)
Supplement: cr2016115x3.pdf [file cr2016115x3.pdf]

**Table S3.** Primers used for preparation of the plant transformation vector constructs (Figure 2A).

| <b>Construct</b>     | <b>Primer</b> | <b>Sequence (5'-3')</b>                                            |
|----------------------|---------------|--------------------------------------------------------------------|
| <i>orf356/orf367</i> | orf356/367-F  | CGGTA <u>ACTGCAGG</u> ATGACGAGAGATAGAATGAGACA ( <i>Pst</i> I)      |
|                      | orf356/367-R  | TTCGAC <u>GGTTACC</u> CTAGGAGGCTGAGTTTTGATCCTCA ( <i>Bst</i> E II) |
| <i>WA314</i>         | WA314-F       | CGAGAGCTGCAGAATGATTCTAAAGC ( <i>Pst</i> I)                         |
|                      | WA314-R       | TATAGAT <u>GGTTACC</u> TACAGCGCT ( <i>Bst</i> E II)                |
