# Supplementary material
Source: PubMed Central journal article supplement (PMC5223224)
Supplement: cr2016115x4.pdf [file cr2016115x4.pdf]

**Table S4.** Primers used for semi-quantitative PCR (Figure 5A, Figure S7).

| <b>Construct</b>     | <b>Primer</b> | <b>Sequence (5'-3')</b>    |
|----------------------|---------------|----------------------------|
| <b>S367</b>          | 367-F         | CGGCAGGGGAAATTGCGTTG       |
|                      | 367-R         | CTAGGCATTCCCTTTTCTCCATTC   |
| <b>S276</b>          | 276-F         | TGCTCTCGAGCCAATGCCAATACCA  |
|                      | 276-R         | TTCACCCTTCTCTCAGCCATGT     |
| <b>S352b</b>         | WA352b-F      | ACAAGCAAGGGTTGTAGGTCCATT   |
|                      | WA352b-R      | GGTTATCGAAACCTTGAAGGGAATAG |
| <b>S310</b>          | S310-F        | TTCGAACGTGCGTGTCCCGATTCATT |
|                      | S310-R        | TTCACCCTTCTCTCAGCCATGT     |
| <b>S314a</b>         | S314-F        | TCGTATCACGGATGTTGGTTCGCGCT |
|                      | S314-R        | ATCTAGGCATTCCCTTTTCTCCATTC |
| <b><i>Actin1</i></b> | Actin1-F      | GGAATGGAAGCTGCGGGTA        |
|                      | Actin1-R      | ACCACAGGTAGCAATAGGTA       |
