# Supplementary material
Source: PubMed Central journal article supplement (PMC5223224)
Supplement: cr2016115x5.pdf [file cr2016115x5.pdf]

**Table S5.** Primers used for quantitative PCR (Figure 5B).

| <b>Construct</b>       | <b>Primer</b> | <b>Sequence (5'-3')</b> |
|------------------------|---------------|-------------------------|
| <b>S367</b>            | q367-F        | GGAAATTGCGTTGGCCCATA    |
|                        | q367-R        | AGCGGGAGGCATAGCTTGTT    |
| <b>S276</b>            | q276-F        | AATTCGTATCTTGAAATG      |
|                        | q276-R        | CCCTCCTCCTTCTGACAATA    |
| <b>S352b</b>           | qWA352b-F     | TTGCCTTATTTGACCTG       |
|                        | qWA352b-R     | GCTTCACTAGGCCAGGGTT     |
| <b><i>OsActin1</i></b> | qOsActin1-F   | GCATCTCTCAGCACATTCCA    |
|                        | qOsActin1-R   | GCTCCTCTTGCTTAGCATT     |
