# Supplementary material
Source: PubMed Central journal article supplement (PMC5223224)
Supplement: cr2016115x6.pdf [file cr2016115x6.pdf]

**Table S6.** Primers used for qRT-PCR (Figure 3).

| <b>Construct</b>           | <b>Primer</b> | <b>Sequence (5'-3')</b>   |
|----------------------------|---------------|---------------------------|
| <i>WA314/WA352b/WA352c</i> | qRT-F         | GGAGGATCTATTTGAACTGAAAGT  |
| <i>/orf367/orf314</i>      | qRT-R         | GTAAGCGGACTCTTTCGACCAAG   |
| <i>orf284</i>              | q284-F        | CGGGATCATGAGGAAGGATCATT   |
|                            | q284-R        | CCTCTTTCGATCTTCTAATTGGAA  |
| <i>Atp6</i>                | qAtp6-F       | GGCATTACGATCGTTGGATTTC    |
|                            | qAtp6-R       | TTGATGGAGATTTATAGCATCATTC |
