# Supplementary material
Source: PubMed Central journal article supplement (PMC5223224)
Supplement: cr2016115x7.pdf [file cr2016115x7.pdf]

**Table S7.** Primers used for construction of yeast two-hybrid vectors (Figure 6A, C, D and Figure S7).

| Construct                                                          | Primer     | Sequence (5'-3')                                                |
|--------------------------------------------------------------------|------------|-----------------------------------------------------------------|
| <b>WA314</b>                                                       | y-F1       | ATGGCCATGGATAA GCTTTGTTTCGATTATGCAT ( <i>Nco</i> I)             |
|                                                                    | y-R1       | GTTCTTCTGCAGCTAGGAAGCGGAGTTTTGAT ( <i>Pst</i> I)                |
| <b>WA314-TCs</b>                                                   | y-F2       | ATGGCCATGGCATCAACGACTCCTCCG ( <i>Nco</i> I)                     |
|                                                                    | y-R2       | GTTCTTCTGCAGCTAGGAAGCGGAGTTTTGAT ( <i>Pst</i> I)                |
| <b>WA352c/orf356/367</b>                                           | y-F3       | AGTGCCATGGTCTAACTTGTTGCTCCTTCT ( <i>Nco</i> I)                  |
|                                                                    | y-R3       | GTTCTTCTGCAGCTAGGAGGCTGAGTTTTGATCCTCA ( <i>Pst</i> I)           |
| <b>WA352c/orf356/367-TCs</b>                                       | y-F4       | ATGGCCATGGCATCAACGACTCCTCCG ( <i>Nco</i> I)                     |
|                                                                    | y-R4       | GTTCTTCTGCAGCTAGGAGGCTGAGTTTTGATCCTCA ( <i>Pst</i> I)           |
| <b>SWC1/3/5</b>                                                    | SWC1/3/5-F | CTAGTGAAGCGGGTCTGAAGGAT                                         |
|                                                                    | SWC1/3/5-R | CTAGGAGGCTGAGTTTTGATCCTCA                                       |
| <b>SWC2</b>                                                        | SWC2-F     | ACGAGGGCGGGTATGGGCCAACGCAATTTCCCCTGCCGGCG<br>GTGCAGCGGATCCTCA   |
|                                                                    | SWC2 -R    | CCGCCGCGAGGGGAAATTGCGTTGGCCCATACGCCGCCCTCG<br>TCCTCCTTTCAAGAAAG |
| <b>SWC4</b>                                                        | SWC4 -F    | CGCCCTCGTCCTCCTTTCAAGAAAG                                       |
|                                                                    | SWC4-R     | TCTAGGAGGCTGAGTTTTGATCCTC                                       |
| <b>WA352c/orf356/orf367/orf310/<br/>orf284a/orf284b/orf276-cs1</b> | RCS1-F     | ATCTGTCCATGGCGGTCAATCAACCGCT TCCA ( <i>Nco</i> I)               |
|                                                                    | RCS1-R     | TGCAGTGGATCCTAGGAGGCTGAGTTTTGAT ( <i>Bam</i> H I)               |
| <b>WA314/orf314-cs1</b>                                            | 314cs1-F   | ATCTGTCCATGGCGGTCAATCAACCGCT TCCA ( <i>Nco</i> I)               |
|                                                                    | 314cs1-R   | TGCAGTGGATCCTAGGAAGCGGAGTTTTGAT ( <i>Bam</i> H I)               |
| <b>Zmorf179-cs1</b>                                                | Zmcs1-F    | ATTCATCCATGGCGGTCAATCAACCGCTTCA ( <i>Nco</i> I)                 |
|                                                                    | Zmcs1-R    | TTCAATGGATCCTCACCCGCCCGTAAGCGGACTCT ( <i>Bam</i> H I)           |
| <b>Gmorf271-cs1</b>                                                | Gmcs1-F    | TTCTATCCATGGCGGTCAATCAACCGCTTCA ( <i>Nco</i> I)                 |
|                                                                    | Gmcs1-R    | AGCAGTGGATCCTAGGTGGCAGAGTGTGAT ( <i>Bam</i> H I)                |
