# Supplementary material
Source: PubMed Central journal article supplement (PMC5223224)
Supplement: cr2016115x8.pdf [file cr2016115x8.pdf]

A

| Construct          | Transformed plant  | Generation                        | Total no. plants | No. segregant plants |                   |
|--------------------|--------------------|-----------------------------------|------------------|----------------------|-------------------|
|                    |                    |                                   |                  | Fertile              | Partially sterile |
| MTS-WA314          | Rice               | T <sub>0</sub>                    | 23               | 19 (+)               | 4 (+)             |
|                    |                    | T <sub>1</sub> -1                 | 180              | 83 (-)               | 97 (+)            |
|                    |                    | T <sub>1</sub> -2                 | 118              | 58 (-)               | 60 (+)            |
|                    |                    | T <sub>1</sub> -3                 | 70               | 37 (-)               | 33 (+)            |
|                    |                    | T <sub>1</sub> -4                 | 61               | 34 (-)               | 27 (+)            |
|                    |                    | BC <sub>1</sub> T <sub>1</sub> -1 | 30               | 16 (-)               | 14 (+)            |
|                    |                    | BC <sub>1</sub> T <sub>1</sub> -2 | 10               | 5 (-)                | 5 (+)             |
|                    |                    | BC <sub>1</sub> T <sub>1</sub> -3 | 13               | 6 (-)                | 7 (+)             |
|                    |                    | BC <sub>1</sub> T <sub>1</sub> -4 | 22               | 13 (-)               | 9 (+)             |
|                    |                    | BC <sub>1</sub> T <sub>2</sub> -1 | 105              | 28 (-)               | 77 (+)            |
|                    |                    | BC <sub>1</sub> T <sub>2</sub> -2 | 113              | 38 (-)               | 75 (+)            |
| MTS-WA314          | <i>Arabidopsis</i> | T <sub>1</sub>                    | 32               | 10 (+)               | 22 (+)            |
|                    |                    | T <sub>2</sub> -1                 | 30               | 13 (-)               | 17 (+)            |
|                    |                    | T <sub>2</sub> -2                 | 30               | 18 (-)               | 12 (+)            |
|                    |                    | T <sub>2</sub> -3                 | 30               | 9 (-)                | 21 (+)            |
| MTS- <i>orf356</i> | Rice               | T <sub>0</sub>                    | 21               | 21 (+)               | 0                 |
|                    |                    | T <sub>1</sub> -1                 | 20               | 20 [13 (+), 7 (-)]   | 0                 |
|                    |                    | T <sub>1</sub> -2                 | 20               | 20 [15 (+), 5 (-)]   | 0                 |
| MTS- <i>orf367</i> | Rice               | T <sub>0</sub>                    | 26               | 26 (+)               | 0                 |
|                    |                    | T <sub>1</sub> -1                 | 20               | 20 [17 (+), 3 (-)]   | 0                 |

B

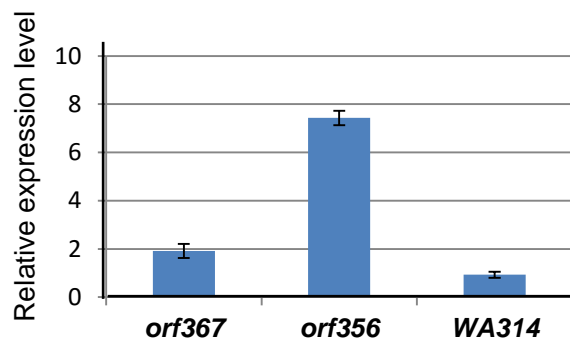

**Figure S1.** Male sterility and fertility and the co-segregation with the transgenes in the rice and *Arabidopsis* transgenic plants.

(A) All progenies of rice lines (T<sub>1</sub>, BC<sub>1</sub>T<sub>1</sub>, BC<sub>1</sub>T<sub>2</sub>) and *Arabidopsis* lines (T<sub>2</sub>) were derived from the partial male-sterile T<sub>0</sub> (rice) and T<sub>1</sub> (*Arabidopsis*) plants, respectively. “+” and “-” indicate the presence and absence of the transgenes, respectively. (B) Expression of the transgenes in anthers (at meiosis stage) of some transgenic (T<sub>1</sub>) plants with *MTS-WA314* (partial male sterile), *MTS-orf365* (male fertile) and *MTS-orf367* (male fertile) by qRT-PCR, using *Actin 1* as the control (ratios of target genes/*Actin 1*).
