# Supplementary material
Source: PubMed Central journal article supplement (PMC5223224)
Supplement: cr2016115x9.pdf [file cr2016115x9.pdf]

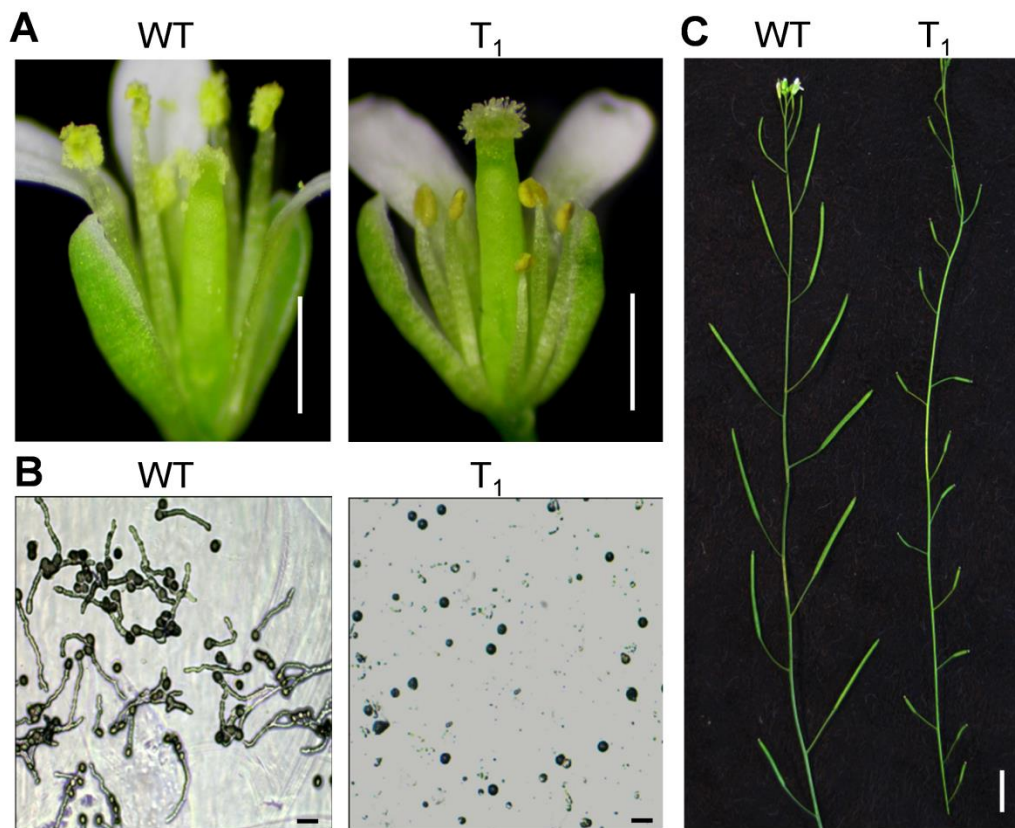

**Figure S2.** Fertility phenotypes of *Arabidopsis* T<sub>1</sub> plants with MTS-WA314. (A) Anthers; (B) Pollen germination assay in liquid media; (C) Siliques. WT, wild type; T<sub>1</sub>, MTS-WA314 transgenic plant. Scale bars: 1 mm for flowers, 50 μm for pollen, and 5 mm for siliques.
