# Supplementary material
Source: PubMed Central journal article supplement (PMC5223224)
Supplement: cr2016115x10.pdf [file cr2016115x10.pdf]

| Introduced structure | Generation                     | Total no. plants | No. segregants |         |
|----------------------|--------------------------------|------------------|----------------|---------|
|                      |                                |                  | Fertile        | Sterile |
| S314a                | F <sub>1</sub>                 | 10               | 10             | 0       |
|                      | BC <sub>1</sub> F <sub>1</sub> | 8                | 6              | 2       |
|                      | BC <sub>2</sub> F <sub>1</sub> | 68               | 0              | 68      |
|                      | BC <sub>3</sub> F <sub>1</sub> | 53               | 0              | 53      |
|                      | BC <sub>4</sub> F <sub>1</sub> | 98               | 0              | 98      |
| S352b                | F <sub>1</sub>                 | 16               | 16             | 0       |
|                      | BC <sub>1</sub> F <sub>1</sub> | 34               | 28             | 6       |
|                      | BC <sub>2</sub> F <sub>1</sub> | 40               | 0              | 40      |
|                      | BC <sub>3</sub> F <sub>1</sub> | 37               | 0              | 37      |
|                      | BC <sub>4</sub> F <sub>1</sub> | 38               | 0              | 38      |
| S367                 | F <sub>1</sub>                 | 7                | 7              | 0       |
|                      | BC <sub>1</sub> F <sub>1</sub> | 13               | 13             | 0       |
|                      | BC <sub>2</sub> F <sub>1</sub> | 60               | 60             | 0       |
|                      | BC <sub>3</sub> F <sub>1</sub> | 19               | 19             | 0       |
|                      | BC <sub>4</sub> F <sub>1</sub> | 23               | 23             | 0       |
| S356                 | F <sub>1</sub>                 | 4                | 4              | 0       |
|                      | BC <sub>1</sub> F <sub>1</sub> | 4                | 4              | 0       |
|                      | BC <sub>2</sub> F <sub>1</sub> | 30               | 30             | 0       |

**Figure S3.** Male phenotype of the backcrossed rice lines.

The lines with the S314a, S352b, S367 and S356 structures were bred by backcrossing with the maintainer line ZS97B (with the recessive restorer genes *rf3* and *rf4*) as the recurrent parent. All F<sub>1</sub> and most BC<sub>1</sub>F<sub>1</sub> segregants with S314a and S352b were male-fertile, suggesting that these cytoplasm-donor accessions also carried dominant restorer gene(s) that could restore the male fertility of the hybrid plants. Then, the male-sterile BC<sub>1</sub>F<sub>1</sub> plants with S314a and S352b (and homozygous *rf3* and *rf4-i* from ZS97B) were used for further backcrossing to produce the sterile BC<sub>2</sub>F<sub>1</sub>, BC<sub>3</sub>F<sub>1</sub> and BC<sub>4</sub>F<sub>1</sub> plants.
