# Supplementary material
Source: PubMed Central journal article supplement (PMC5223224)
Supplement: cr2016115x14.pdf [file cr2016115x14.pdf]

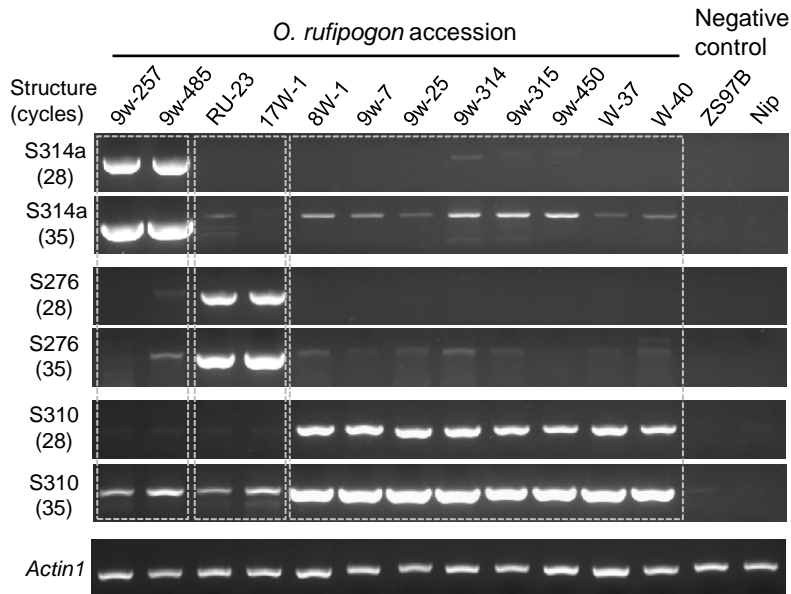

**Figure S7.** Coexistence of S314a, S276 and S310 and their substoichiometric shifting. Semi-quantitative PCR using structure-specific primers with 28 and 35 cycles was performed to detect the structures and estimate their abundance in leaves of the selected *O. rufipogon* accessions.
